# Supplementary material
Source: PubMed Central journal article supplement (PMC7162648)
Supplement: mmc1.pdf [file mmc1.pdf]

# THE LANCET

## Gastroenterology & Hepatology

### Supplementary appendix

This appendix formed part of the original submission and has been peer reviewed.  
We post it as supplied by the authors.

Supplement to: Iacucci M, Cannatelli R, Labarile N, et al. Endoscopy in inflammatory bowel diseases during the COVID-19 pandemic and post-pandemic period.  
*Lancet Gastroenterol Hepatol* 2020; published online April 16. [https://doi.org/10.1016/S2468-1253\(20\)30119-9](https://doi.org/10.1016/S2468-1253(20)30119-9).

## Supplementary figure. Protective Equipment (PPE) for endoscopy in IBD patients

 Consider all IBD patients at high risk

1. Hands hygiene

2. Use of PPE

3. Cleaning of the surface

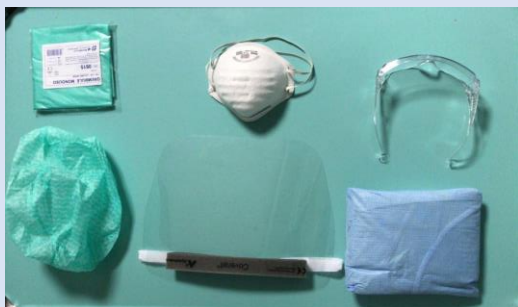

- FFP2 or FFP3
- Goggles or face shield
- Long sleeves water – resistant gowns
- Gloves
- Hairnet

- Common detergent (chlorine containing)
- Ultraviolet irradiation
- Ozone

Endoscopy in a negative pressure room or open windows 1 h before and after the procedure
